# Supplementary material for: Multiple vaccine comparison in the same adults from the VITAL study reveals vaccine-specific and age-related humoral response patterns
Source: bioRxiv or medRxiv preprint supplement (doi:10.1101/2024.01.22.24301601), 2024-01-23
Supplement: Supplementary file [file media-1.pdf]

## Supplementary material

**Supplementary Table 1. Demographics characteristics of study population.**

|                                                                                | <b>Young adults</b> | <b>Middle-aged adults</b> | <b>Older adults</b> |
|--------------------------------------------------------------------------------|---------------------|---------------------------|---------------------|
| <b>Number</b>                                                                  | 59                  | 95                        | 161                 |
| <b>Age - mean [min-max]</b>                                                    | 36 [25-49]          | 58 [50-64]                | 76 [65-98]          |
| <b>% male</b>                                                                  | 34%                 | 41%                       | 53%                 |
| <b>BMI - mean [min-max]</b>                                                    | 24 [18.7-35.5]      | 24.6 [18.7-37.0]          | 26.0 [17.4-40.6]    |
| <b>Number of seasonal influenza vaccinations since 2014 - median [min-max]</b> | 3 [1-5]             | 5 [1-5]                   | 5 [1-5]             |
| <b>Frailty index – median [min – max]</b>                                      | 0.07 [0.0 – 0.27]   | 0.10 [0.01 – 0.36]        | 0.18 [0.03 – 0.53]  |
| <b>EQ-5D-3L – median [min – max]</b>                                           | 1 [0.18 – 1]        | 1 [-0.03 – 1]             | 1 [0.30 – 1]        |
| <b>Number of medications – median [min – max]</b>                              | 0 [0 – 7]           | 1 [0 – 7]                 | 4 [0 – 12]          |
| <b>Cardiovascular disease - n(%)</b>                                           | 0 (0%)              | 4 (4.2%)                  | 42 (26.1%)          |
| <b>High blood pressure - n(%)</b>                                              | 4 (6.8%)            | 28 (29.5%)                | 82 (50.9%)          |
| <b>Cancer - n(%)</b>                                                           | 0 (0%)              | 9 (9.5%)                  | 41 (25.5%)          |
| <b>Diabetes - n(%)</b>                                                         | 0 (0%)              | 6 (6.3%)                  | 20 (12.4%)          |
| <b>Lung diseases - n(%)</b>                                                    | 1 (1.7%)            | 7 (7.4%)                  | 6 (3.7%)            |
| <b>Joint inflammation - n(%)</b>                                               | 0 (0%)              | 3 (3.2%)                  | 11 (6.8%)           |
| <b>Disease of Nervous system - n(%)</b>                                        | 0 (0%)              | 0 (0%)                    | 5 (3.1%)            |

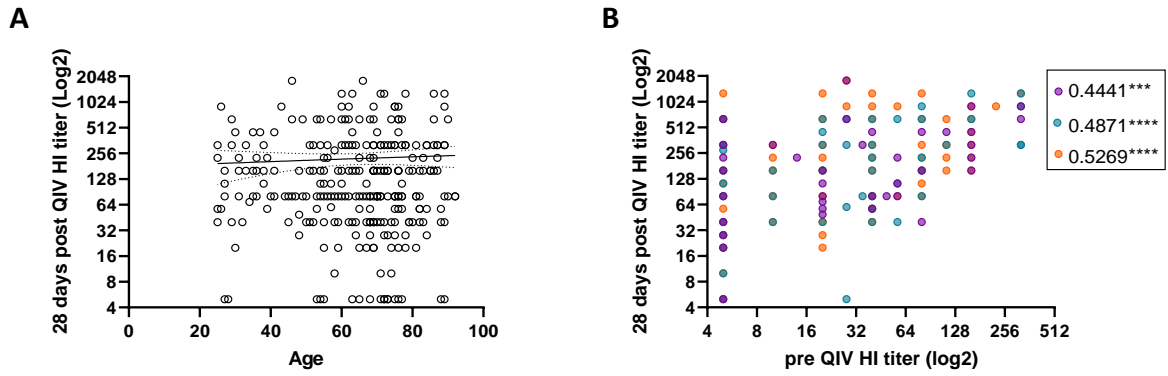

**Supplementary Figure 1. Additional analysis on H3N2 HI titers 28 days post QIV vaccination.**

**(A)** Correlation between the 28 days post-QIV H3N2 HI titers and age. **(B)** The correlation between the pre-vaccination and 28 days post QIV vaccination HI titers per age group (young adults: purple, middle-aged adults: blue, and older adults: orange). The Spearman rho is provided. \*\*\*  $p < 0.001$ , \*\*\*\*  $p < 0.0001$ .

**Supplementary Table 2. 28 days post PCV13 vaccination pneumococcal serotype specific geometric mean IgG concentrations.**

| <i>Pneumococcal serotype</i> | <i>Young adults</i> | <i>Middle-aged adults</i>       | <i>Older adults</i>               |
|------------------------------|---------------------|---------------------------------|-----------------------------------|
| 1                            | 9.80 [5.78-16.61]   | 5.56 [3.60-8.59]                | 4.11 [2.84-5.93]* <sup>a</sup>    |
| 3                            | 2.25 [1.64-3.08]    | 1.82 [1.39-2.38]                | 1.48 [1.14-1.93]                  |
| 4                            | 4.64 [3.32-6.48]    | 2.07 [1.46-2.95]** <sup>a</sup> | 1.37 [1.00-1.88]**** <sup>a</sup> |
| 5                            | 17.67 [11.22-27.81] | 14.53 [9.94-21.24]              | 9.18 [6.56-12.83]                 |
| 6A                           | 13.35 [8.03-22.20]  | 7.49 [4.79-11.71]               | 5.19 [3.66-7.36]* <sup>a</sup>    |
| 6B                           | 9.99 [6.30-15.83]   | 4.46 [2.80-7.12]                | 2.77 [1.93-4.00]**** <sup>a</sup> |
| 7F                           | 16.16 [11.10-23.54] | 13.59 [10.18-18.14]             | 11.62 [8.66-15.59]                |
| 9V                           | 4.75 [3.41-6.62]    | 3.92 [2.81-5.48]                | 3.30 [2.36-4.62]                  |
| 14                           | 4.84 [2.79-8.40]    | 4.73 [3.12-7.18]                | 3.54 [2.41-5.21]                  |
| 18C                          | 8.14 [5.03-13.18]   | 8.05 [5.51-11.76]               | 10.10 [7.32-13.90]                |
| 19A                          | 12.73 [8.71-18.61]  | 8.96 [6.43-12.49]               | 10.10 [7.55-13.43]                |
| 19F                          | 8.47 [5.73-12.51]   | 6.25 [4.54-8.62]                | 6.00 [4.46-8.07]                  |
| 23F                          | 13.24 [8.52-20.60]  | 4.87 [2.96-8.00]* <sup>a</sup>  | 3.07 [2.13-4.44]**** <sup>a</sup> |

Concentrations are in ug/mL [95% CI]. <sup>a</sup>: compared to the young adults. \*p<0.05, \*\*p<0.01, \*\*\*p<0.001, \*\*\*\*p<0.0001

**Supplementary Table 3. Correlation between age and the 28 days post PCV13 vaccination pneumococcal serotype specific IgG concentrations.**

| <i>Pneumococcal serotype</i> | <i>rho</i> | <i>p-value</i> |
|------------------------------|------------|----------------|
| 1                            | -0.156     | 0.009*         |
| 3                            | -0.107     | 0.076          |
| 4                            | -0.235     | <0.0001*       |
| 5                            | -0.183     | 0.002*         |
| 6A                           | -0.146     | 0.015*         |
| 6B                           | -0.208     | 0.001*         |
| 7F                           | -0.044     | 0.467          |
| 9V                           | -0.074     | 0.219          |
| 14                           | -0.050     | 0.413          |
| 18C                          | 0.064      | 0.293          |
| 19A                          | -0.025     | 0.680          |
| 19F                          | -0.075     | 0.216          |
| 23F                          | -0.251     | <0.0001*       |

The Spearman rho is given. \* indicates a significant correlation.

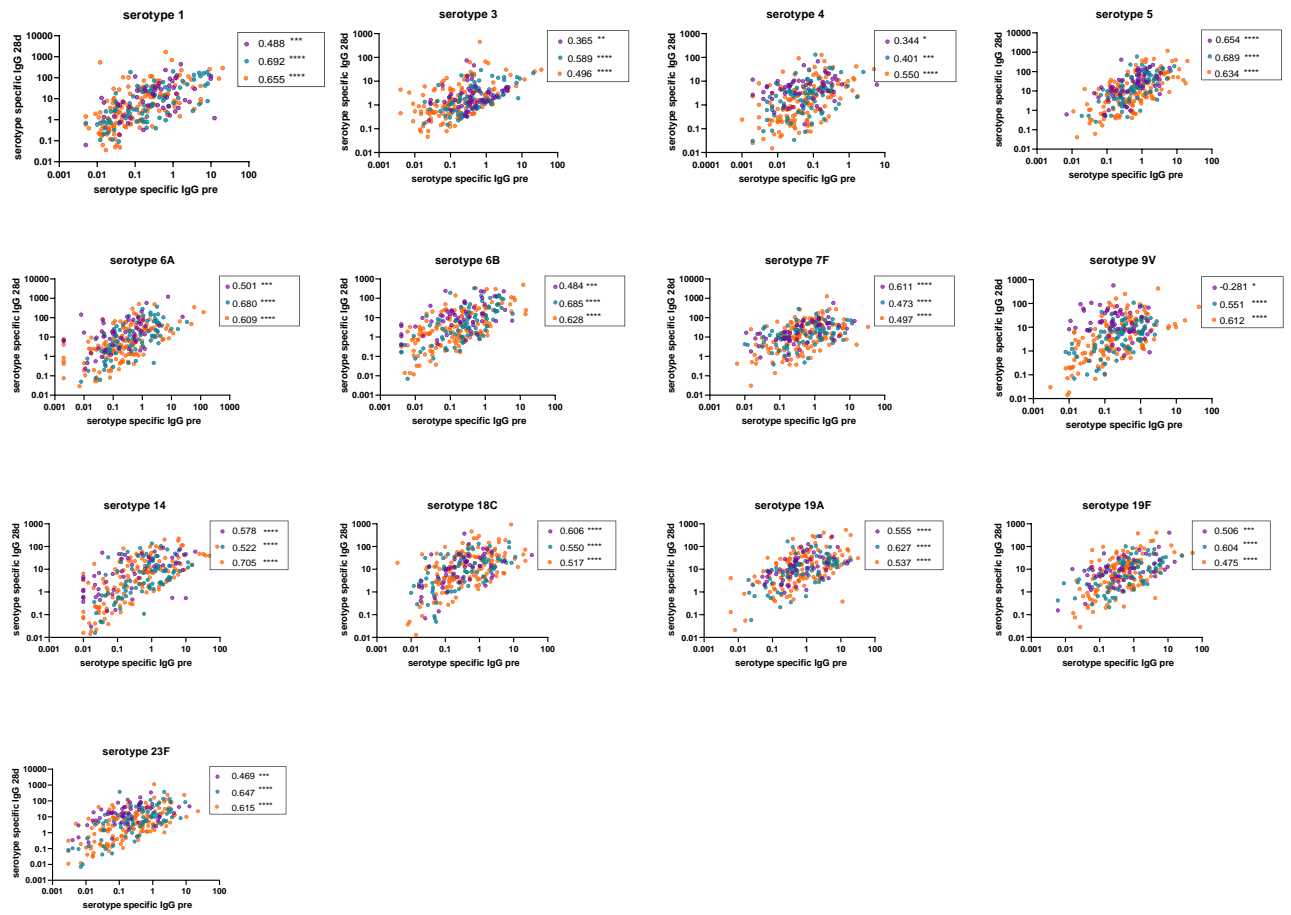

**Supplementary Figure 2. Analysis of the correlation between pre and post PCV13 vaccination serotype specific IgG concentrations.**

The correlation between the pre-vaccination and 28 days post PCV13 vaccination serotype specific IgG concentrations (ug/mL) (Log10 scale) separated for the 3 different age groups (young adults: purple, middle-aged adults: blue, older adults: orange). The Spearman's rho is indicated. \* $p < 0.05$ , \*\* $p < 0.01$ , \*\*\* $p < 0.001$ , \*\*\*\* $p < 0.0001$ .

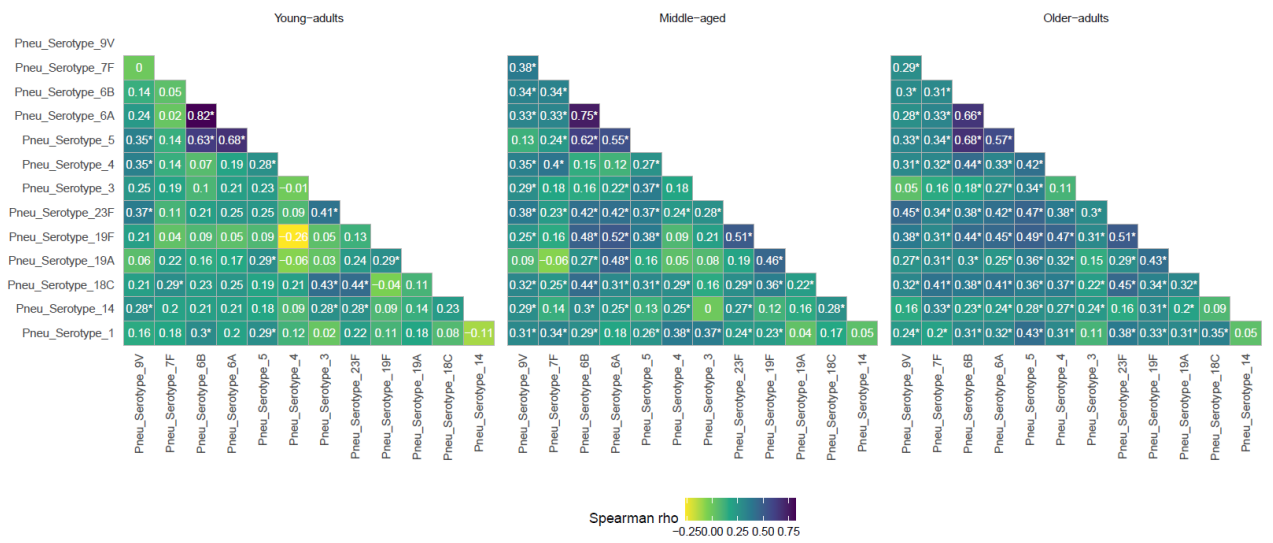

**Supplementary Figure 3. Partial correlation matrix between the pneumococcal serotype-specific IgG concentrations 28 days post-PCV13 vaccination split by age group.** The Spearman correlation coefficient is indicated and the \* indicates a significant correlation.

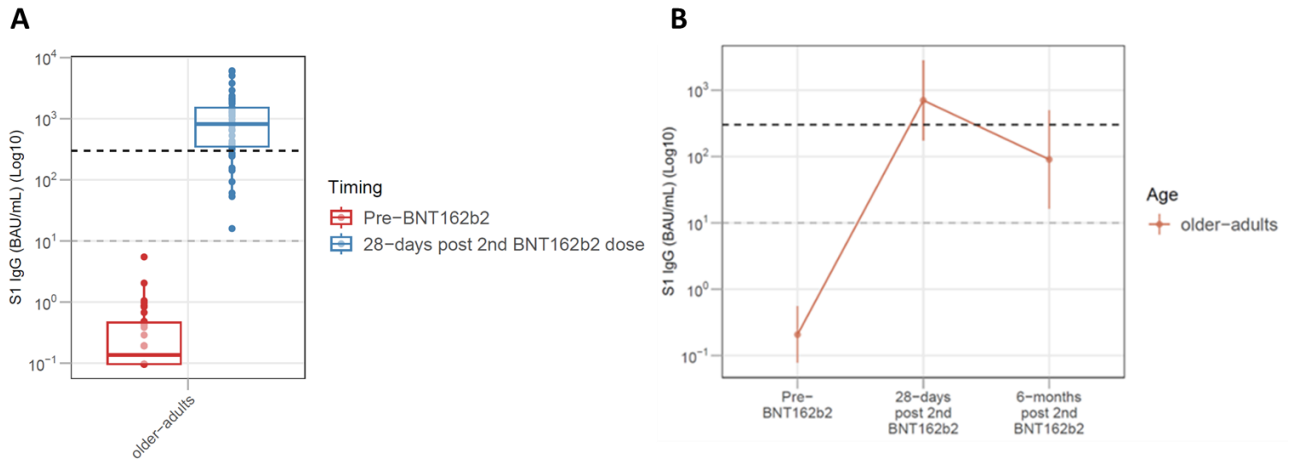

**Supplementary Figure 4. BNT162b2 induced S1 specific IgG responses in the older adults.**

**(A)** The pre- and 28- days post 2<sup>nd</sup> BNT162b2 vaccination S1-specific IgG concentrations (BAU/mL) (presented on a log<sub>10</sub> scale) in the older adults (n=42) (mean age 84 (range 76-98)). The box plots indicate the median and interquartile range. **(B)** The longitudinal (pre-, 28 days, and 6 months post 2<sup>nd</sup> BNT162b2 vaccination) S1-specific IgG concentrations split in the older adults (n=39). The lines indicate the mean and standard error of the mean. No statistics are indicated in this graph. In both A and B, the grey dotted line (S1 specific IgG = 10 BAU/mL) indicates the cut-off for seropositivity. The black dotted line (S1 specific IgG = 300 BAU/mL) indicates the cut-off for an adequate response.

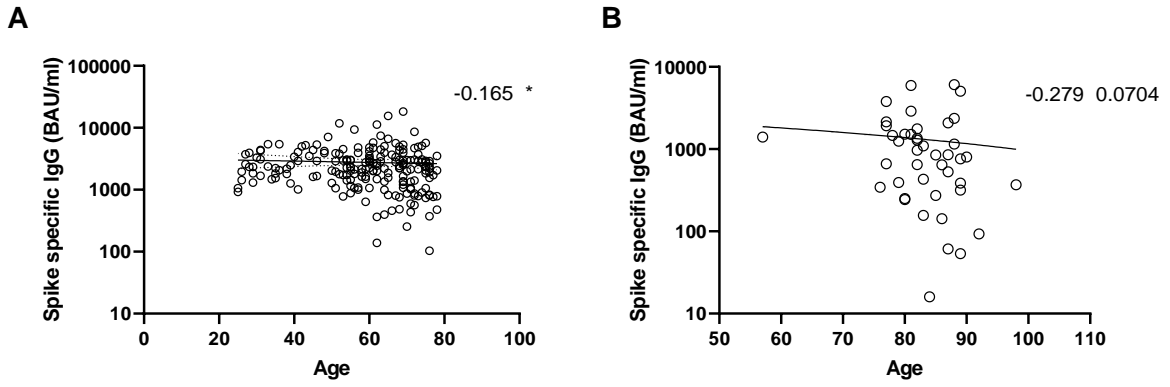

**Supplementary Figure 5. Analysis of SARS-COV2 vaccine responses in relation to age.**

The Spike specific S1 IgG concentrations (BAU/mL) following two vaccinations of mRNA-1273 **(A)** and BNT162b2 **(B)** in relation to age. The Spearman's rho is indicated. \* $p < 0.05$

**Supplementary Table 4. The division of the young, middle-aged and older adults over the different humoral response categories.**

|                                | <b>Young adults (%)</b> | <b>Middle-aged adults (%)</b> | <b>Older adults (%)</b> |
|--------------------------------|-------------------------|-------------------------------|-------------------------|
| <b>Dual vaccine analysis</b>   |                         |                               |                         |
| <i>QIV</i>                     |                         |                               |                         |
| 1                              | 14.6                    | 26.5                          | 30.1*                   |
| 2                              | 29.2*                   | 28.9                          | 23.5                    |
| 3                              | 29.2*                   | 21.7                          | 20.6                    |
| 4                              | 27.1*                   | 22.9                          | 25.7                    |
| <i>PCV13</i>                   |                         |                               |                         |
| 1                              | 8.3                     | 26.5                          | 30.9*                   |
| 2                              | 18.8                    | 20.5                          | 27.9*                   |
| 3                              | 47.9*                   | 30.1                          | 11.8                    |
| 4                              | 25                      | 22.9                          | 29.4*                   |
| <i>Dual score</i>              |                         |                               |                         |
| 1                              | 0                       | 6                             | 11*                     |
| 2                              | 27.1                    | 32.5*                         | 29.4                    |
| 3                              | 43.8*                   | 43.4                          | 41.9                    |
| 4                              | 29.2*                   | 18.1                          | 17.6                    |
| <b>Triple vaccine analysis</b> |                         |                               |                         |
| <i>QIV</i>                     |                         |                               |                         |
| 1                              | 12.2                    | 22.9                          | 34.2*                   |
| 2                              | 31.7*                   | 30.0                          | 21.5                    |
| 3                              | 34.1                    | 37.1*                         | 26.6                    |
| 4                              | 22.0*                   | 10.0                          | 17.7                    |
| <i>PCV13</i>                   |                         |                               |                         |
| 1                              | 12.2                    | 27.1                          | 31.6*                   |
| 2                              | 29.3                    | 22.9                          | 30.4*                   |
| 3                              | 24.4                    | 25.7*                         | 10.1                    |
| 4                              | 34.1*                   | 24.3                          | 27.8                    |
| <i>mRNA-1273</i>               |                         |                               |                         |
| 1                              | 12.2                    | 21.4                          | 35.4*                   |
| 2                              | 31.7*                   | 27.1                          | 19.0                    |
| 3                              | 22.0                    | 28.6*                         | 22.8                    |
| 4                              | 34.1*                   | 22.9                          | 22.8                    |
| <i>Triple score</i>            |                         |                               |                         |
| 1                              | 2.4                     | 8.6                           | 12.7*                   |
| 2                              | 31.7                    | 42.9                          | 49.4*                   |
| 3                              | 53.7*                   | 42.9                          | 31.6                    |
| 4                              | 12.2*                   | 5.7                           | 6.3                     |

The division of participants of every age group over the 4 categories is calculated per vaccine or response score. The age group with the highest proportion in a response category is indicate with a \*.
